# Supplementary material
Source: Springer Nature journal article supplement (https://www.springermedizin.de/resource/supplementary/13643_2012_50_MOESM5_ESM.pdf/9681370)
Supplement: MOESM5 [file 9681370]

### Collation of views studies included in the review

| First Author          | Location                                  | Study Aims                                                                                                                                 | Study participants                                                      | Study Design – sampling and data collection methods                                     | Study Design –data analysis methods | Sensitivity and appropriateness of study methods to allow participants to express their views                                            | Notes                                               |
|-----------------------|-------------------------------------------|--------------------------------------------------------------------------------------------------------------------------------------------|-------------------------------------------------------------------------|-----------------------------------------------------------------------------------------|-------------------------------------|------------------------------------------------------------------------------------------------------------------------------------------|-----------------------------------------------------|
| Anderson (2004)       | London, UK                                | Explore the lived experiences of immigrant women with HIV                                                                                  | 62 African-born women<br>100% immigrants                                | Purposive sample<br>Brief quantitative survey followed by 1-1 in-depth interviews       | Thematic analysis                   | Female interviewers<br>Interviews in French or English<br>Survey administered orally if required                                         | Related to Doyal (2003), Doyal (2005), Doyal (2006) |
| Apostolopoulos (2006) | Arizona & South Carolina, USA             | Examine intertwined individual and environmental factors in relation to HIV/STI risks among male –gay and straight- immigrant farm workers | 23 Mexican migrant farm workers<br>100% immigrants                      | Snowball sample<br>1-1 in-depth interviews                                              | Thematic analysis                   | Interviews in Spanish<br>No tape recording or written consent due to sensitivity of undocumented immigration status of some participants |                                                     |
| Ayala (2001)          | Miami, New York City and Los Angeles, USA | Analyze the relationship between race, class, and unprotected sex among immigrant gay men                                                  | 293 Latino gay men<br>75% immigrants                                    | Convenience sample in 3 cities<br>28 focus groups followed by brief quantitative survey | Thematic analysis                   | Participants offered choice of focus groups in English or Spanish                                                                        | Related to Diaz (1999) Diaz (2000)                  |
| Bhattacharya (2004)   | New York City, USA                        | Explore social capital resources and influences on HIV risk behaviours among immigrant heterosexual men                                    | 17 immigrant Asian Indian immigrant heterosexual men<br>100% immigrants | Purposive sample<br>1-1 in-depth interviews                                             | Grounded theory                     | Not stated                                                                                                                               |                                                     |

| First Author          | Location           | Study Aims                                                                                              | Study participants                                                                                                                              | Study Design – sampling and data collection methods                                                                        | Study Design –data analysis methods | Sensitivity and appropriateness of study methods to allow participants to express their views                | Notes |
|-----------------------|--------------------|---------------------------------------------------------------------------------------------------------|-------------------------------------------------------------------------------------------------------------------------------------------------|----------------------------------------------------------------------------------------------------------------------------|-------------------------------------|--------------------------------------------------------------------------------------------------------------|-------|
| Castro-Vazquez (2006) | Japan              | Explore the relationship between HIV/AIDS and ‘community’ support for immigrants with HIV               | 20 HIV-positive Latin Americans- mostly Nikkejin of Japanese ancestry<br><br>100% immigrants                                                    | Snowball sampling<br><br>1-1 in-depth interviews                                                                           | Systemic networks analysis          | Interviews in Spanish and Portuguese                                                                         |       |
| Chin (1999)           | Los Angeles, USA   | Explore how immigrant women assess HIV risk in social interactions                                      | 21 Asian and Pacific Islander women<br><br>75% immigrants                                                                                       | Purposive sampling<br><br>1-1 in-depth interviews                                                                          | Grounded theory                     | Interviews were conducted by a female researcher from an Asian and Pacific Islander background               |       |
| Chin (2007)           | New York City, USA | Explore the experiences and needs of immigrants living with HIV/AIDS                                    | 35 HIV-positive Asian and Pacific Islanders- qualitative arm<br><br>89 HIV-positive Asian and Pacific Islanders- survey<br><br>> 90% immigrants | Focus Groups<br><br>1-1 in-depth interviews<br><br>Surveys                                                                 | Thematic analysis                   | Interviews and some focus groups were conducted in community languages<br><br>Interpreters were offered/used |       |
| Chinouya (2006)       | Milton Keynes, UK  | Explore the role of faith, family life, service utilization and coping among immigrants living with HIV | 22 heterosexual HIV-positive Africans -17 females and 5 males<br><br>20 faith leaders<br><br>100% immigrants                                    | Purposive sampling (inferred)<br><br>1-1 in-depth interviews<br><br>Focus groups<br><br>Quantitative survey (not reported) | Thematic analysis                   | 1-1 interviews enhanced confidentiality of HIV-positive participants                                         |       |

| <b>First Author</b> | <b>Location</b>                          | <b>Study Aims</b>                                                                                                                                      | <b>Study participants</b>                                                                    | <b>Study Design – sampling and data collection methods</b>                  | <b>Study Design –data analysis methods</b> | <b>Sensitivity and appropriateness of study methods to allow participants to express their views</b> | <b>Notes</b>                        |
|---------------------|------------------------------------------|--------------------------------------------------------------------------------------------------------------------------------------------------------|----------------------------------------------------------------------------------------------|-----------------------------------------------------------------------------|--------------------------------------------|------------------------------------------------------------------------------------------------------|-------------------------------------|
| Dawson (2001)       | Melbourne, Australia                     | Explore immigrant women’s gender and sexual identities in relation to HIV and sexual health                                                            | 50 women-25 born in Chile and 25 born in El Salvador<br><br>100% immigrants                  | Snowball sampling<br><br>1-1 in-depth interviews                            | Grounded theory                            | Most interviews in Spanish                                                                           | Related to Dawson (2003)            |
| Dawson (2003)       | Melbourne, Australia and Santiago, Chile | Explore past and present social changes on the life experiences related to HIV/AIDS among immigrant women and women in the ‘home’ country              | 25 immigrant women born in Chile<br><br>16 women in Chile<br><br>100% immigrants (Melbourne) | 50 women-25 born in Chile and 25 born in El Salvador<br><br>100% immigrants | Grounded theory                            | Not stated                                                                                           | Related to Dawson (2001)            |
| Diaz (1999)         | New York, Los Angeles & Miami, USA       | Explore high rates of unprotected anal intercourse among immigrant gay and bisexual men                                                                | 293 Latino gay and bisexual men<br><br>75% immigrants                                        | 24 focus groups                                                             | Thematic analysis (inferred)               | Participants were stratified according to age and preferred language                                 | Related to Diaz (2000) Ayala (2001) |
| Diaz (2000)         | New York, Los Angeles & Miami, USA       | Explore poverty, racism and homophobia and their impact on sexual risks, substance use and psychological distress among immigrant gay and bisexual men | 912 Latino gay men<br><br>73% immigrants                                                     | Survey based on extensive qualitative research                              | Not stated                                 | Not stated                                                                                           | Related to Diaz (1999) Ayala (2001) |

| <b>First Author</b> | <b>Location</b> | <b>Study Aims</b>                                                                                                                   | <b>Study participants</b>                                                                                                                         | <b>Study Design – sampling and data collection methods</b>                     | <b>Study Design –data analysis methods</b> | <b>Sensitivity and appropriateness of study methods to allow participants to express their views</b> | <b>Notes</b>                                           |
|---------------------|-----------------|-------------------------------------------------------------------------------------------------------------------------------------|---------------------------------------------------------------------------------------------------------------------------------------------------|--------------------------------------------------------------------------------|--------------------------------------------|------------------------------------------------------------------------------------------------------|--------------------------------------------------------|
| Dodds (2006)        | UK              | Explore social discourses around HIV-related stigma and discrimination among a range of people including immigrants living with HIV | 125 participants - 44 gay/bisexual men, 34 heterosexual African men & 41 heterosexual African women<br><br>100% immigrants (African participants) | 20 ‘mixed’ focus groups                                                        | Thematic analysis                          | Used African-born facilitators in groups that were ‘mixed’                                           | Related to Dodds (2004)                                |
| Dodds (2004)        | UK              | Explore social discourses around HIV-related stigma and discrimination among a range of people including immigrants living with HIV | 125 participants - 44 gay/bisexual men, 34 heterosexual African men, 41 heterosexual African women<br>100% immigrants (African participants)      | 20 ‘mixed’ focus groups                                                        | Thematic analysis                          | Used African-born facilitators in groups that were ‘mixed’                                           | Related to Dodds (2006)                                |
| Doyal (2003)        | London, UK      | Explore the lived experiences of immigrant women with HIV                                                                           | 62 African-born women<br><br>100% immigrants                                                                                                      | Purposive sample<br>Brief survey followed by 1-1 in-depth interviews           | Thematic analysis (inferred)               | Not stated                                                                                           | Related to Anderson (2004), Doyal (2005), Doyal (2006) |
| Doyal (2005)        | London, UK      | Explore the lived experiences of immigrant women with HIV                                                                           | 62 African-born women<br><br>100% immigrants                                                                                                      | Purposive sample<br>Brief survey followed by 1-1 in-depth interviews           | Thematic analysis (inferred)               | Female interviewers<br>Interviews in French or English<br>Survey administered orally if required     | Related to Doyal (2003), Anderson (2004), Doyal (2006) |
| Doyal (2006)        | London, UK      | Explore the lived experiences of immigrant women with HIV                                                                           | 62 African-born women<br><br>100% immigrants                                                                                                      | Purposive sample(inferred)<br>Brief survey followed by 1-1 in-depth interviews | Thematic analysis (inferred)               | Not stated                                                                                           | Related to Doyal (2003), Doyal (2005), Anderson (2004) |

| <b>First Author</b> | <b>Location</b>      | <b>Study Aims</b>                                                                                                  | <b>Study participants</b>                                                                                                                                                       | <b>Study Design – sampling and data collection methods</b>               | <b>Study Design –data analysis methods</b>                                                                  | <b>Sensitivity and appropriateness of study methods to allow participants to express their views</b> | <b>Notes</b> |
|---------------------|----------------------|--------------------------------------------------------------------------------------------------------------------|---------------------------------------------------------------------------------------------------------------------------------------------------------------------------------|--------------------------------------------------------------------------|-------------------------------------------------------------------------------------------------------------|------------------------------------------------------------------------------------------------------|--------------|
| Flaskerud (1991)    | Los Angeles, USA     | Explore HIV/AIDS health beliefs, and their relationship to ‘traditional’ beliefs, among low-income immigrant women | 59 low-income Latinas<br><br>70% immigrants                                                                                                                                     | Convenience sampling<br><br>17 focus groups                              | Content analysis                                                                                            | Bilingual facilitators in focus groups                                                               |              |
| Flaskerud (1996)    | Los Angeles, USA     | Explore sexual practices, attitudes and knowledge related to HIV transmission among low-income immigrant women     | 508 low-income Latinas(surveys)<br><br>55 low-income Latinas (focus groups)<br><br>91% immigrants (surveys )<br>% immigrants in focus groups not stated but inferred to be >70% | Convenience sampling<br><br>Surveys carried out followed by focus groups | Content analysis<br><br>Surveys analysed and focus groups used to clarify preliminary quantitative findings | Spanish and English surveys<br><br>Bilingual facilitators in focus groups                            |              |
| Gifford (1998)      | Melbourne, Australia | Explore ways in which immigrant women understand risks to sexual health including HIV                              | 60 women - 20 Chilean, 20 Turkish, 20 second generation Greek<br><br>90% immigrants(Chilean and Turkish participants)                                                           | Purposive, snowball sampling<br><br>1-1 in-depth interviews              | Content analysis                                                                                            | Interviews conducted by ethnically matched bilingual interviewers mostly in people’s homes           |              |

| <b>First Author</b> | <b>Location</b>         | <b>Study Aims</b>                                                                                                    | <b>Study participants</b>                                                                                 | <b>Study Design – sampling and data collection methods</b> | <b>Study Design –data analysis methods</b> | <b>Sensitivity and appropriateness of study methods to allow participants to express their views</b>                                                     | <b>Notes</b>                                                 |
|---------------------|-------------------------|----------------------------------------------------------------------------------------------------------------------|-----------------------------------------------------------------------------------------------------------|------------------------------------------------------------|--------------------------------------------|----------------------------------------------------------------------------------------------------------------------------------------------------------|--------------------------------------------------------------|
| Hirsch (2002)       | Atlanta, USA and Mexico | Explore social constructions of HIV risks among immigrant women and women in the 'home' country                      | 26 Mexican women -13 in Atlanta & 13 in Mexico<br><br>100% immigrants(Atlanta)                            | Sampling not stated<br><br>1-1 in-depth interviews         | Thematic analysis                          | Not stated                                                                                                                                               |                                                              |
| Jemmott (1999)      | Penn., USA              | Explore perceptions of HIV risks and culturally appropriate considerations for HIV prevention among immigrant women  | 30 Asian and Pacific Islander women – 22 community members and 8 service providers<br><br>100% immigrants | Snowball sampling<br><br>3 focus groups                    | Thematic analysis                          | Interpreters available in focus groups                                                                                                                   |                                                              |
| Kang (2003)         | New York City, USA      | Explore cultural attitudes, and HIV-related behaviours and perceptions among undocumented immigrants living with HIV | 16 HIV-positive Asian and Pacific Islander immigrants<br><br>100% immigrants                              | Convenience sampling<br><br>1-1 in-depth interviews        | Thematic analysis                          | Focus group with undocumented immigrants living with HIV was used to develop 1-1 interview guide<br><br>Interviews conducted in multiple Asian languages |                                                              |
| Korner (2007a)      | Sydney, Australia       | Explore the lived experience of immigrants living with HIV/AIDS – residency issues                                   | 29 participants living with HIV (men and women)<br><br>96% immigrants                                     | Convenience sampling<br><br>1-1 in-depth interviews        | Thematic analysis                          | Interviews conducted in participant's language of preference<br><br>Interpreters and/or bilingual support workers were present                           | Related to Korner (2007b)<br>Korner (2007c)<br>Korner (2005) |
| Korner (2007b)      | Sydney, Australia       | Explore the lived experience of immigrants living with HIV/AIDS –late HIV diagnosis                                  | 29 participants living with HIV (men and women)<br><br>96% immigrants                                     | Convenience sampling<br><br>1-1 in-depth interviews        | Thematic analysis                          | Interviews conducted in participant's language of preference<br>Interpreters and/or bilingual support workers were present                               | Related to Korner (2007a)<br>Korner (2007c)<br>Korner (2005) |

| <b>First Author</b> | <b>Location</b>     | <b>Study Aims</b>                                                                   | <b>Study participants</b>                                         | <b>Study Design – sampling and data collection methods</b>            | <b>Study Design – data analysis methods</b> | <b>Sensitivity and appropriateness of study methods to allow participants to express their views</b>                                                                                    | <b>Notes</b>                                                  |
|---------------------|---------------------|-------------------------------------------------------------------------------------|-------------------------------------------------------------------|-----------------------------------------------------------------------|---------------------------------------------|-----------------------------------------------------------------------------------------------------------------------------------------------------------------------------------------|---------------------------------------------------------------|
| Korner (2007c)      | Sydney, Australia   | Explore the lived experience of immigrants living with HIV/AIDS – disclosure issues | 29 participants living with HIV (men and women)<br>96% immigrants | Convenience sampling<br>1-1 in-depth interviews                       | Thematic analysis                           | Interviews conducted in participant’s language of preference<br><br>Interpreters and/or bilingual support workers were present                                                          | Related to Korner (2007a)<br>Korner (2007b)<br>Korner (2005)  |
| Korner (2005)       | Sydney, Australia   | Explore the lived experience of immigrants living with HIV/AIDS                     | 29 participants living with HIV (men and women)<br>96% immigrants | Convenience sampling<br>1-1 in-depth interviews                       | Thematic analysis                           | Interviews conducted in participant’s language of preference<br><br>Interpreters and/or bilingual support workers were present                                                          | Related to Korner (2007a)<br>Korner (2007b)<br>Korner (2007c) |
| McQuiston (1998)    | North Carolina, USA | Explore the preventive practices for HIV and STIs of newly arrived immigrants       | 31 Hispanic participants (men and women)<br>100% immigrants       | Convenience sampling<br>3 focus groups (men)<br>3 focus groups(women) | Content analysis                            | Bilingual facilitators in focus groups<br><br>Facilitators in focus groups matched by gender                                                                                            | Related to McQuiston (2000)                                   |
| McQuiston (2000)    | North Carolina, USA | Explore the preventive practices for HIV of newly arrived immigrants                | 31 Hispanic participants (men and women)<br>100% immigrants       | Convenience sampling<br>3 focus groups (men)<br>3 focus groups(women) | Content analysis                            | Bilingual facilitators in focus groups<br><br>Facilitators in focus groups matched by gender<br><br>Credibility of study findings checked in informal interviews with community members | Related to McQuiston (1998)                                   |

| <b>First Author</b> | <b>Location</b>     | <b>Study Aims</b>                                                                                                                                                                        | <b>Study participants</b>                                                                                                         | <b>Study Design – sampling and data collection methods</b>                                                     | <b>Study Design – data analysis methods</b> | <b>Sensitivity and appropriateness of study methods to allow participants to express their views</b>                                                                                                                                                                              | <b>Notes</b> |
|---------------------|---------------------|------------------------------------------------------------------------------------------------------------------------------------------------------------------------------------------|-----------------------------------------------------------------------------------------------------------------------------------|----------------------------------------------------------------------------------------------------------------|---------------------------------------------|-----------------------------------------------------------------------------------------------------------------------------------------------------------------------------------------------------------------------------------------------------------------------------------|--------------|
| Moreno (2007)       | New York City, USA  | Explore the contextual risks of HIV-positive status and domestic violence against immigrant women                                                                                        | 32 Latina women living with HIV<br><br>65% immigrants                                                                             | Convenience sampling<br><br>3 focus groups<br>5 1-1 in-depth interviews                                        | Thematic analysis                           | Bilingual facilitator in focus groups<br><br>Facilitators in focus groups matched by gender<br><br>Preliminary themes presented to community members and peers to validate findings                                                                                               |              |
| Nemoto (2005)       | San Francisco, USA  | Explore the cognitive, cultural and contextual factors that influence HIV-related risk behaviours among female immigrants who engage in sex work at massage parlours and owners/managers | 43 masseuses – mostly Thai and Vietnamese<br><br>8 parlour owners/managers<br><br>100% immigrants (masseuses and owners/managers) | Convenience sampling<br><br>8 focus groups(masseuses)<br><br>1-1 in-depth interviews (parlour owners/managers) | Thematic analysis                           | Mapping of suburbs where massage parlours were located by outreach workers<br><br>Focus groups stratified by ethnicity and language<br><br>Focus groups carried out in Thai or Vietnamese<br><br>Parlour owners/managers also interviewed in participant’s language of preference |              |
| Poon (2002)         | Toronto, Canada     | Explore the cultural and social barriers which influence HIV-related risks among gay, lesbian, and bisexual young immigrants                                                             | 15 Asian young people<br><br>14 immigrant participants (95%)                                                                      | Convenience sampling<br><br>3 focus groups<br><br>Some 1-1 in-depth interviews                                 | Thematic analysis                           | Pilot focus group conducted prior to the study<br><br>Preliminary findings sent to an advisory group of community members for feedback                                                                                                                                            |              |
| Rhodes (2007)       | North Carolina, USA | Explore cultural and social determinants of HIV risk and identify potential interventions among immigrant men                                                                            | 70 Latino men<br><br>100% immigrants- mostly Mexican                                                                              | Convenience sampling<br><br>7 focus groups                                                                     | Thematic analysis                           | Bilingual facilitators in focus groups<br>Interview guide developed iteratively in Spanish<br>Recruitment of participants through a Latino soccer club                                                                                                                            |              |



| <b>First Author</b> | <b>Location</b>     | <b>Study Aims</b>                                                                                                                           | <b>Study participants</b>                                                                                                    | <b>Study Design – sampling and data collection methods</b>              | <b>Study Design – data analysis methods</b> | <b>Sensitivity and appropriateness of study methods to allow participants to express their views</b>                                                                                                                                       | <b>Notes</b>                                                                   |
|---------------------|---------------------|---------------------------------------------------------------------------------------------------------------------------------------------|------------------------------------------------------------------------------------------------------------------------------|-------------------------------------------------------------------------|---------------------------------------------|--------------------------------------------------------------------------------------------------------------------------------------------------------------------------------------------------------------------------------------------|--------------------------------------------------------------------------------|
| Shedlin (2005)      | New York State, USA | Explore social and behavioural factors influencing HIV risk among newly arrived (<1 year) immigrants                                        | 86 Latinos participated in focus groups<br><br>51 Latinos participated in 1-1 depth interviews<br><br>100% recent immigrants | Snowball sampling<br><br>11 focus groups<br><br>1-1 in-depth interviews | Thematic analysis                           | Research team conducted focus group activities prior to study to allay fear of immigration authorities<br><br>Focus groups were stratified by nationality, sex and site<br><br>One key informant focus group and interviews were conducted |                                                                                |
| Shedlin (2002)      | New York City, USA  | Explore predominant cultural influences social regarding sex work, drug use and HIV/AIDS among immigrants with very high risks for HIV/AIDS | 20 Dominicans involved in drug-related or sex work-related activities<br><br>% immigrants not stated but inferred to be >70% | Purposive sampling<br><br>1-1 in-depth interviews                       | Thematic analysis                           | Interviews conducted in participant's language of preference –all Spanish<br><br>Emerging themes complemented findings from quantitative data                                                                                              | A qualitative arm following a larger quantitative survey in the same community |
| Shedlin (2004)      | New York City, USA  | Explore perceptions, beliefs experiences and knowledge of care issues for immigrants –most of whom were living with HIV                     | 57 Latino men and women - mainly PLWHA<br><br>100 % immigrants                                                               | Convenience sampling<br><br>Focus groups                                | Thematic analysis                           | Focus groups were stratified by ethnicity and sex                                                                                                                                                                                          |                                                                                |

| <b>First Author</b> | <b>Location</b>        | <b>Study Aims</b>                                                                                                                                                  | <b>Study participants</b>                                                                                                    | <b>Study Design – sampling and data collection methods</b>           | <b>Study Design –data analysis methods</b> | <b>Sensitivity and appropriateness of study methods to allow participants to express their views</b>        | <b>Notes</b> |
|---------------------|------------------------|--------------------------------------------------------------------------------------------------------------------------------------------------------------------|------------------------------------------------------------------------------------------------------------------------------|----------------------------------------------------------------------|--------------------------------------------|-------------------------------------------------------------------------------------------------------------|--------------|
| Steel (2003)        | Sweden                 | Explore the relationship of pre-migrations trauma on HIV risk behaviour among refugees post-settlement and explore the development of HIV prevention interventions | 122 Sub-Saharan African refugees<br><br>100% immigrants                                                                      | Snowball sampling<br><br>Focus groups<br><br>1-1 in-depth interviews | Thematic analysis                          | Participant's had the opportunity to choose the language, ethnicity and gender of the interviewer           |              |
| Wilson (2004)       | New York City, USA     | Explore experiences of, and responses to, social discrimination among gay immigrants                                                                               | 23 Asian and Pacific Islander gay men whose narratives of 166 episodes of discrimination were analysed<br><br>91% immigrants | Purposive sampling<br><br>1-1 in-depth interviews                    | Thematic analysis                          | None stated                                                                                                 |              |
| Yoshikawa (2003)    | Northeastern city, USA | Explore the experiences of immigrant peer educators to develop culturally anchored theories of HIV prevention among their immigrant target populations             | 35 Asian and Pacific Islander peer educators<br><br>89% immigrants                                                           | Focus groups                                                         | Grounded Theory                            | Focus groups were stratified by target groups (e.g. youth, gay men, heterosexual men) that they worked with |              |

| First Author  | Location                             | Study Aims                                                                          | Study participants                                                                             | Study Design – sampling and data collection methods | Study Design –data analysis methods | Sensitivity and appropriateness of study methods to allow participants to express their views                                                                                                              | Notes |
|---------------|--------------------------------------|-------------------------------------------------------------------------------------|------------------------------------------------------------------------------------------------|-----------------------------------------------------|-------------------------------------|------------------------------------------------------------------------------------------------------------------------------------------------------------------------------------------------------------|-------|
| Zuniga (2006) | San Diego/Tijuana, USA/Mexico border | Explore barriers and facilitators to service utilisation by HIV-positive immigrants | 9 HIV-positive Latino gay men<br>9 HIV-positive Latina women<br><br>100% immigrants (inferred) | Focus groups                                        | Content analysis                    | Bilingual facilitators in focus groups<br><br>Focus groups conducted in preferred first language (Spanish)<br><br>Coding of transcripts carried out in first language before being translated into English |       |

Adapted from (Rees et al., 2004) and (Darbes, Kennedy, & Rutherford, 2005)

Darbes, L., Kennedy, G., & Rutherford, G. (2005). *Systematic review of behavioural prevention interventions to prevent HIV infection in communities of color*. Retrieved 3 May, 2008, from <http://hivinsite.ucsf.edu/>

Rees, R., Kavanagh, J., Burchett, H., Sheperd, J., Brunton, G., Harden, A., et al. (2004). *HIV health promotion and men who have sex with men: A systematic review of research relevant to the development and implementation of effective and appropriate interventions*. Retrieved 15 October, 2006, from [www.eppi.ioe.ac.uk](http://www.eppi.ioe.ac.uk)
